# Supplementary material for: Spectrum of Rare and Common Genetic Variants in Arrhythmogenic Cardiomyopathy Patients
Source: MDPI journal article supplement (doi:10.3390/biom12081043), 2022-07-28
Supplement: s1 [file s1]

## Supplementary Materials

**Supplementary Table S1.** TruSight™ Cardio Sequencing list of 174 genes reported being associated with 15 inherited cardiac conditions (aortic valve disease, Marfan syndrome, Loeys-Dietz syndrome, short QT syndrome, catecholaminergic polymorphic ventricular tachycardia, familial hypercholesterolemia, restrictive cardiomyopathy, non-compaction cardiomyopathy, Noonan syndrome, arrhythmogenic right ventricular cardiomyopathy, Brugada syndrome, structural heart disease, long QT syndrome, familial aortic aneurysm, familial atrial fibrillation, hypertrophic cardiomyopathy, dilated cardiomyopathy).

| TruSight™ Cardio Sequencing gene panel list |         |        |         |         |        |         |         |        |
|---------------------------------------------|---------|--------|---------|---------|--------|---------|---------|--------|
| ABCC9                                       | CACNB2  | DOLK   | GJA5    | KCNJ5   | MYH11  | PRDM16  | SGCG    | TNNC1  |
| ABCG5                                       | CALM1   | DPP6   | GLA     | KCNJ8   | MYH6   | PRKAG2  | SHOC2   | TNNI3  |
| ABCG8                                       | CALR3   | DSC2   | GPD1L   | KCNQ1   | MYH7   | PRKAR1A | SLC25A4 | TNNT2  |
| ACTA1                                       | CASQ2   | DSG2   | GPIHBP1 | KLF10   | MYL2   | PTPN11  | SLC2A10 | TPM1   |
| ACTA2                                       | CAV3    | DSP    | HADHA   | KRAS    | MYL3   | RAF1    | SMAD3   | TRDN   |
| ACTC1                                       | CBL     | DTNA   | HCN4    | LAMA2   | MYLK   | RANGRF  | SMAD4   | TRIM63 |
| ACTN2                                       | CBS     | EFEMP2 | HFE     | LAMA4   | MYLK2  | RBM20   | SNTA1   | TRPM4  |
| AKAP9                                       | CETP    | ELN    | HRAS    | LAMP2   | MYO6   | RYR1    | SOS1    | TTN    |
| ALMS1                                       | COL3A1  | EMD    | HSPB8   | LDB3    | MYOZ2  | RYR2    | SREBF2  | TTR    |
| ANK2                                        | COL5A1  | EYA4   | ILK     | LDLR    | MYPN   | SALL4   | TAZ     | TXNRD2 |
| ANKRD1                                      | COL5A2  | FBN1   | JAG1    | LDLRAP1 | NEXN   | SCN1B   | TBX20   | VCL    |
| APOA4                                       | COX15   | FBN2   | JPH2    | LMF1    | NKX2-5 | SCN2B   | TBX3    | ZBTB17 |
| APOA5                                       | CREB3L3 | FHL1   | JUP     | LMNA    | NODAL  | SCN3B   | TBX5    | ZHX3   |
| APOB                                        | CRELD1  | FHL2   | KCNA5   | LPL     | NOTCH1 | SCN4B   | TCAP    | ZIC3   |
| APOC2                                       | CRYAB   | FKRP   | KCND3   | LTBP2   | NPPA   | SCN5A   | TGFB2   |        |
| APOE                                        | CSRP3   | FKTN   | KCNE1   | MAP2K1  | NRAS   | SCO2    | TGFB3   |        |
| BAG3                                        | CTF1    | FXN    | KCNE2   | MAP2K2  | PCSK9  | SDHA    | TGFBR1  |        |
| BRAF                                        | DES     | GAA    | KCNE3   | MIB1    | PDLIM3 | SEPN1   | TGFBR2  |        |
| CACNA1C                                     | DMD     | GATAD1 | KCNH2   | MURC    | PKP2   | SGCB    | TMEM43  |        |
| CACNA2D1                                    | DNAJC19 | GCKR   | KCNJ2   | MYBPC3  | PLN    | SGCD    | TMPO    |        |

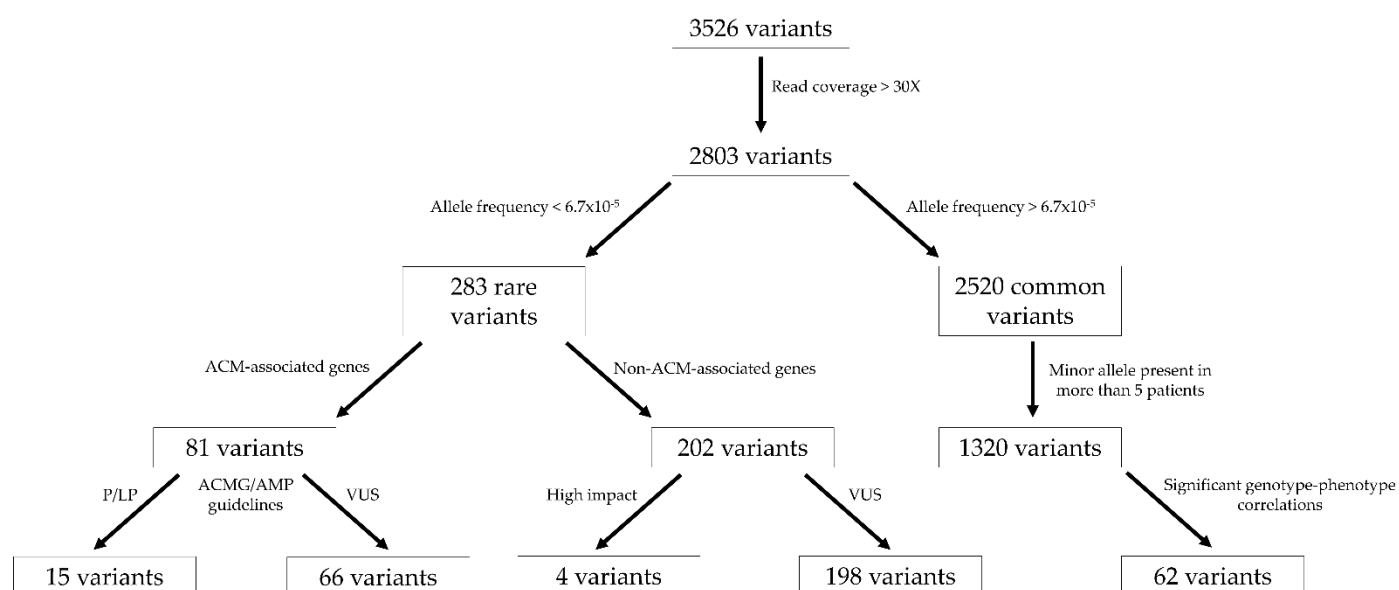

**Supplementary Figure S1.** Analysis workflow for filtering and selection of rare and common variants. Abbreviations: ACM: arrhythmic cardiomyopathy; P: pathogenic; LP: likely pathogenic; VUS: variant of uncertain significance; ACMG/AMP: American College of Medical Genetics and Genomics / Association for Molecular Pathology.

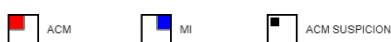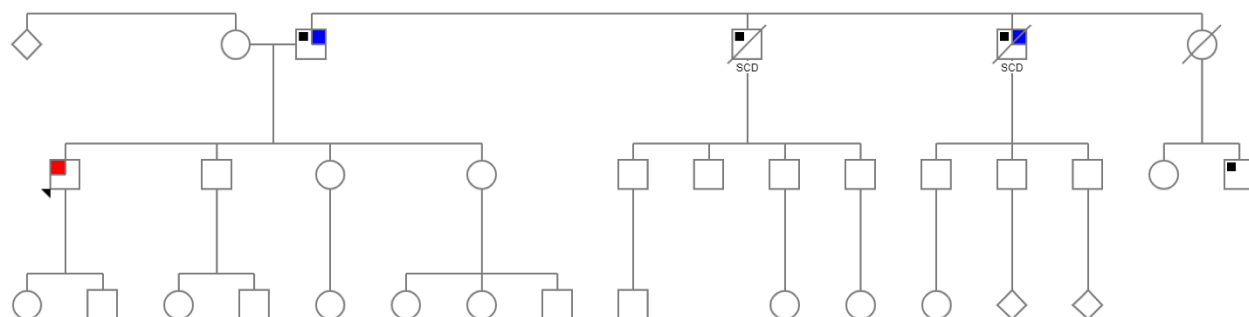

**Supplementary Figure S2.** Family pedigree of patient s07.

**Supplementary Table S2.** Schematic summary of the 141 rare genetic variants classified as VUS, LP or P. The carrier patient, the type of mutation, the position on the genome (taking hg19/GRCh37 genome as reference), the gene in which it is found, the nomenclature referring to the CDS and the protein, and the hetero- or homozygous status are indicated. The genes are color-coded according to their level of association with ACM: red=definitive evidence of association; pink=moderate evidence; blue=limited evidence; green=no evidence; yellow=refuted/disputed.

| Patient | Stop gain                                         | Frameshift                                                   | In-frame deletion | Splicing                       |  | Missense                                  |                                           |  |
|---------|---------------------------------------------------|--------------------------------------------------------------|-------------------|--------------------------------|--|-------------------------------------------|-------------------------------------------|--|
| s15     | Pathogenic<br><i>DSP</i><br>c.6850C>T<br>p.R2284* |                                                              |                   |                                |  |                                           |                                           |  |
| s18     |                                                   | Pathogenic<br><i>PKP2</i><br>c.1643delG<br>p.G548Vfs*15      |                   |                                |  |                                           |                                           |  |
| s83     |                                                   | Pathogenic<br><i>PKP2</i><br>c.1643delG<br>p.G548Vfs*15      |                   |                                |  |                                           |                                           |  |
| s17     |                                                   | Pathogenic<br><i>PKP2</i><br>c.2013delC<br>p.K672Rfs*12      |                   |                                |  |                                           |                                           |  |
| s77     |                                                   | Pathogenic<br><i>PKP2</i><br>c.2013delC<br>p.K672Rfs*12      |                   |                                |  |                                           |                                           |  |
| s06     |                                                   | Pathogenic<br><i>PKP2</i><br>c.2013delC<br>p.K672Rfs*12      |                   |                                |  | VUS <i>DSG2</i><br>c.1088C>T<br>p.S363L   | VUS <i>TTN</i><br>c.38914A>G<br>p.M12972V |  |
| s14     |                                                   | Pathogenic<br><i>PKP2</i><br>c.2013delC<br>p.K672Rfs*12      |                   | VUS <i>DPP6</i><br>c.2078+5G>A |  |                                           |                                           |  |
| s03     |                                                   | Pathogenic<br><i>PKP2</i><br>c.1264_1265delTT<br>p.L422Sfs*3 |                   |                                |  | VUS <i>TTN</i><br>c.14425G>A<br>p.G4809S  |                                           |  |
| s37     |                                                   | Pathogenic<br><i>PKP2</i><br>c.1238_1239insG<br>p.A414Sfs*12 |                   |                                |  | VUS <i>TTN</i><br>c.77296A>G<br>p.I25766V |                                           |  |
| s64     |                                                   | Pathogenic<br><i>DSP</i><br>c.4321_4322del<br>p.Q1442Efs*8   |                   |                                |  | VUS <i>TTN</i><br>c.60095A>T<br>p.K20032M |                                           |  |
| s44     | Pathogenic<br><i>DSP</i><br>c.2000delG<br>p.W667* |                                                              |                   |                                |  | VUS <i>TTN</i><br>c.62434G>A<br>p.G20812R |                                           |  |

|     |                                                            |                                                                           |  |                                          |                                |                                               |                                          |                                        |
|-----|------------------------------------------------------------|---------------------------------------------------------------------------|--|------------------------------------------|--------------------------------|-----------------------------------------------|------------------------------------------|----------------------------------------|
| s72 | Pathogenic<br><i>DSP</i><br>c.1306C>T<br>p.Q436*           |                                                                           |  |                                          |                                | VUS <i>TTN</i><br>c.55343T>C<br>p.V18448A     |                                          |                                        |
| s75 | Pathogenic<br><i>DSC2</i><br>c.268G>T<br>p.E90*            |                                                                           |  |                                          |                                | VUS <i>DSP</i><br>c.7783A>G<br>p.T2595A       | VUS <i>TTN</i><br>c.16892T>C<br>p.I5631T | VUS <i>TTN</i><br>c.2032A>G<br>p.T678A |
| s81 |                                                            |                                                                           |  | Pathogenic<br><i>PKP2</i><br>c.1378+1G>C | VUS <i>ABCC9</i><br>c.284+1G>A |                                               |                                          |                                        |
| s86 |                                                            | Pathogenic<br><i>DES</i><br>c.268_269ins<br>C<br>p.D90Afs*28              |  |                                          |                                | VUS <i>DES</i><br>c.266T>C<br>p.L89P          |                                          |                                        |
| s20 |                                                            | Likely Patho-<br>genic <i>DSC2</i><br>c.2398_2399in<br>sG<br>p.A800Gfs*37 |  |                                          |                                |                                               |                                          |                                        |
| s25 | Likely Patho-<br>genic <i>DSP</i><br>c.3466C>T<br>p.Q1156* |                                                                           |  |                                          |                                |                                               |                                          |                                        |
| s48 | Likely Patho-<br>genic <i>DSP</i><br>c.2821C>T<br>p.R941*  |                                                                           |  |                                          |                                |                                               |                                          |                                        |
| s70 |                                                            | Likely Patho-<br>genic <i>DSC2</i><br>c.1234_1235in<br>sT<br>p.T412Ifs*3  |  |                                          |                                | VUS <i>PKP2</i><br>c.2006G>A<br>p.S669N       |                                          |                                        |
| s01 |                                                            |                                                                           |  |                                          |                                | VUS <i>TTN</i><br>c.66758G>A<br>p.G22253D     |                                          |                                        |
| s02 |                                                            |                                                                           |  |                                          |                                | VUS<br><i>MYBPC3</i><br>c.3472G>A<br>p.V1158I | VUS <i>TTN</i><br>c.7738A>G<br>p.I2580V  |                                        |
| s04 |                                                            |                                                                           |  |                                          |                                | VUS <i>TTN</i><br>c.54952C>T<br>p.R18318C     |                                          |                                        |
| s08 |                                                            |                                                                           |  |                                          |                                | VUS<br><i>MYBPC3</i><br>c.2807C>T<br>p.T936M  |                                          |                                        |
| s09 |                                                            |                                                                           |  |                                          |                                | VUS <i>TTN</i><br>c.70130T>C<br>p.V23377A     |                                          |                                        |

|     |  |  |                                         |  |  |                                       |                                     |                                    |
|-----|--|--|-----------------------------------------|--|--|---------------------------------------|-------------------------------------|------------------------------------|
| s10 |  |  |                                         |  |  | VUS PKP2<br>c.548G>A<br>p.S183N       |                                     |                                    |
| s13 |  |  |                                         |  |  | VUS TTN<br>c.36328G>T<br>p.V12110L    | VUS TTN<br>c.28303G>A<br>p.D9435N   |                                    |
| s19 |  |  |                                         |  |  | VUS MYH7<br>c.2974C>A<br>p.L992M      |                                     |                                    |
| s22 |  |  |                                         |  |  | VUS TTN<br>c.90036C>G<br>p.D30012E    | VUS TTN<br>c.55567G>A<br>p.V18523   |                                    |
| s23 |  |  |                                         |  |  | VUS JUP<br>c.1359G>T<br>p.E453D       | VUS TTN<br>c.72884C>A<br>p.T24295K  | VUS TTN<br>c.62447A>G<br>p.D20816G |
| s26 |  |  |                                         |  |  | VUS TTN<br>c.77845G>T<br>p.A25949S    | VUS TTN<br>c.62782C>T<br>p.R20928W  | VUS TTN<br>c.38368C>T<br>p.P12790S |
| s27 |  |  | VUS DSC2<br>c.2368_2370del<br>p.G790del |  |  | VUS DSC2<br>c.2497C>T<br>p.R833C      |                                     |                                    |
| s28 |  |  |                                         |  |  | VUS DSP<br>c.860A>G<br>p.N287S        |                                     |                                    |
| s29 |  |  |                                         |  |  | VUS TTN<br>c.27348C>G<br>p.D9116E     |                                     |                                    |
| s30 |  |  |                                         |  |  | VUS<br>TMEM43<br>c.1052T>C<br>p.F351S | VUS TTN<br>c.100639A>C<br>p.I33547L | VUS TTN<br>c.55391T>G<br>p.V18464G |
| s41 |  |  |                                         |  |  | VUS TTN<br>c.69266G>A<br>p.G23089D    |                                     |                                    |
| s42 |  |  |                                         |  |  | VUS TTN<br>c.30554C>T<br>p.S10185L    | VUS SCN5A<br>c.1919C>T<br>p.P640L   |                                    |
| s47 |  |  |                                         |  |  | VUS DSC2<br>c.416C>T<br>p.P139L       |                                     |                                    |

|     |  |  |                                                      |                             |  |                                    |                                      |                                    |
|-----|--|--|------------------------------------------------------|-----------------------------|--|------------------------------------|--------------------------------------|------------------------------------|
| s52 |  |  | VUS homo<br>MYBPC3<br>c.1102_1104del<br>el p.K368del |                             |  | VUS DSP<br>c.2019G>C<br>p.Q673H    |                                      |                                    |
| s53 |  |  |                                                      |                             |  | VUS TTN<br>c.50861C>G<br>p.T16954R | VUS TTN<br>c.39569G>A<br>p.G13190E   |                                    |
| s55 |  |  |                                                      |                             |  | VUS TTN<br>c.17296A>G<br>p.G13190E | VUS TTN<br>c.3589G>A<br>p.V1197I     |                                    |
| s57 |  |  |                                                      |                             |  | VUS TTN<br>c.31274C>T<br>p.S10425L |                                      |                                    |
| s59 |  |  |                                                      |                             |  | VUS SCN5A<br>c.1901C>G<br>p.S634W  |                                      |                                    |
| s60 |  |  |                                                      | VUS<br>TMEM43<br>c.705+7G>A |  | VUS TTN<br>c.97313G>A<br>p.R32438K | VUS TTN<br>c.87176T>C<br>p.F29059S   |                                    |
| s61 |  |  |                                                      |                             |  | VUS DSP<br>c.5642T>C<br>p.I1881T   |                                      |                                    |
| s63 |  |  |                                                      |                             |  | VUS TTN<br>c.41246C>T<br>p.P13749L | VUS SCN5A<br>c.3107A>G<br>p.Q1036R   |                                    |
| s64 |  |  |                                                      |                             |  | VUS TTN<br>c.60095A>T<br>p.K20032M |                                      |                                    |
| s69 |  |  |                                                      |                             |  | VUS TNNT2<br>c.616C>T<br>p.R206W   | VUS<br>MYBPC3<br>c.760C>T<br>p.L254F | VUS TTN<br>c.38526T>A<br>p.D12842E |
| s74 |  |  |                                                      |                             |  | VUS RYR2<br>c.3013A>G<br>p.N1005D  | VUS<br>MYBPC3<br>c.67G>A<br>p.A23T   |                                    |
| s76 |  |  |                                                      |                             |  | VUS TTN<br>c.22208T>C<br>p.I7403T  |                                      |                                    |
| s78 |  |  |                                                      |                             |  | VUS RYR2<br>c.6295G>A<br>p.V2099I  | VUS TTN<br>c.23971C>T<br>p.P7991S    | VUS TTN<br>c.6727G>T<br>p.D2243Y   |

|     |                                          |  |  |  |  |                                        |                                           |                                           |
|-----|------------------------------------------|--|--|--|--|----------------------------------------|-------------------------------------------|-------------------------------------------|
| s80 |                                          |  |  |  |  | VUS <i>LMNA</i><br>c.497G>A<br>p.R166Q | VUS <i>TTN</i><br>c.66029T>G<br>p.I22010S | VUS <i>TTN</i><br>c.43123G>A<br>p.A14375T |
| s86 |                                          |  |  |  |  | VUS <i>DES</i><br>c.1238A>G<br>p.E413G |                                           |                                           |
| s07 | VUS <i>APOB</i><br>c.7537C>T<br>p.R2513* |  |  |  |  |                                        |                                           |                                           |
| s31 | VUS <i>MIB1</i><br>c.376C>T<br>p.R126*   |  |  |  |  |                                        |                                           |                                           |

**Supplementary Table S3.** Contingency table classifying the number of patients carrying the variants for each dichotomous categorical variable for the 31 significant ( $p \leq 0.005$ ) associations. For each variant, we indicated the associated variable and the number of patients presenting the variable, clustered according to the three genotypes (wild type, heterozygous and homozygous). Abbreviations: CDS: coding sequence; WT: wild type; hetero: heterozygous; homo: homozygous; RV: right ventricle; EAM: electro-anatomical mapping; ECHO: echocardiogram; CMR: cardiac magnetic resonance; LV: left ventricle; AF: atrial fibrillation; CMP: cardiomyopathy.

| Gene   | rs ID      | Genome position | CDS position         | Variable                    | n WT patients presenting the variable | n hetero patients presenting the variable | n homo patients presenting the variable | p-value     |
|--------|------------|-----------------|----------------------|-----------------------------|---------------------------------------|-------------------------------------------|-----------------------------------------|-------------|
| SC02   | rs12148    | chr22:50962208  | c.633A>C             | antiarrhythmic therapy      | 5/61                                  | 32/61                                     | 24/61                                   | 0.000249447 |
| SC02   | rs140523   | chr22:50962782  | c.59G>C              | antiarrhythmic therapy      | 5/61                                  | 32/61                                     | 24/61                                   | 0.000249447 |
| MYBPC3 | rs11570050 | chr11:47371484  | c.506-12del          | pathologic RV unipolar EAM  | 1/38                                  | 22/38                                     | 15/38                                   | 0.000432308 |
| LMF1   | rs4984705  | chr16:943107    | c.664-35T>C          | ECO pathologic              | 10/34                                 | 21/34                                     | 3/34                                    | 0.000306645 |
| LAMA2  | rs6569605  | chr6:129807629  | c.7760C>T            | pathologic biopsy           | 2/36                                  | 20/36                                     | 14/36                                   | 0.000384499 |
| MYBPC3 | rs1052373  | chr11:47354787  | c.3288G>A            | ablation                    | 5/24                                  | 16/24                                     | 3/24                                    | 0.000043716 |
| RYR1   | rs1469695  | chr19:38993372  | c.7835+5A>G          | CMR main ventricle involved | 5/24                                  | 14/24                                     | 5/24                                    | 0.000269571 |
| RYR1   | .          | chr19:38995355  | c.8068-29_8068-27del | CMR main ventricle involved | 5/24                                  | 14/24                                     | 5/24                                    | 0.000269571 |
| RYR1   | rs2915958  | chr19:38997459  | c.8693-10G>C         | CMR main ventricle involved | 6/24                                  | 13/24                                     | 5/24                                    | 0.000142771 |
| MYBPC3 | rs3729802  | chr11:47354068  | c.3627+49C>T         | ablation                    | 12/24                                 | 12/24                                     | 0/24                                    | 0.000053492 |
| SGCD   | rs1801193  | chr5:155771579  | c.84T>C              | CMR presence of fat         | 16/41                                 | 9/41                                      | 16/41                                   | 0.000466120 |
| MYPN   | rs2200897  | chr10:69908241  | c.1245+17G>A         | CMR main ventricle involved | 15/24                                 | 8/24                                      | 1/24                                    | 0.000172586 |
| KCNQ1  | rs739502   | chr11:2683152   | c.1394-39T>G         | AF                          | 2/8                                   | 6/8                                       | 0/8                                     | 0.000373785 |
| DPP6   | rs2293353  | chr7:154667628  | c.1896A>G            | family history CMP          | 11/17                                 | 5/17                                      | 1/17                                    | 0.000426630 |
| ABCG8  | rs4148217  | chr2:44099433   | c.1199C>A            | other atrial arrhythmias    | 0/7                                   | 4/7                                       | 3/7                                     | 0.000098691 |
| TTN    | rs6715406  | chr2:179650701  | c.2244G>A            | epsilon wave                | 0/4                                   | 0/4                                       | 4/4                                     | 0.000139767 |
| GLA    | rs2071228  | chrX:100653109  | c.1000-22C>T         | male sex                    | 54/66                                 | 0/66                                      | 12/66                                   | 0.000043550 |
| GLA    | rs2071397  | chrX:100653950  | c.640-16A>G          | male sex                    | 55/66                                 | 0/66                                      | 11/66                                   | 0.000332822 |
| LAMP2  | rs12097    | chrX:119590533  | c.156A>T             | male sex                    | 34/66                                 | 0/66                                      | 32/66                                   | 0.000004252 |
| FHL1   | rs2076705  | chrX:135292022  | c.889-8C>T           | male sex                    | 49/66                                 | 0/66                                      | 17/66                                   | 0.000000064 |
| TAZ    | rs62617809 | chrX:153640406  | c.-266G>A            | male sex                    | 51/66                                 | 0/66                                      | 15/66                                   | 0.000000173 |
| DMD    | rs2270672  | chrX:31676096   | c.8027+11C>T         | male sex                    | 46/66                                 | 0/66                                      | 20/66                                   | 0.000000650 |
| DMD    | rs1801188  | chrX:31697636   | c.7728T>C            | male sex                    | 51/66                                 | 0/66                                      | 15/66                                   | 0.000001285 |
| DMD    | rs1800275  | chrX:31893307   | c.-286+1A>C          | male sex                    | 52/66                                 | 0/66                                      | 14/66                                   | 0.000043888 |
| DMD    | rs3761604  | chrX:31986430   | c.6614+26G>T         | male sex                    | 45/66                                 | 0/66                                      | 21/66                                   | 0.000000082 |
| DMD    | rs1801187  | chrX:32380996   | c.5234G>A            | male sex                    | 35/66                                 | 0/66                                      | 31/66                                   | 0.000000004 |
| DMD    | rs228406   | chrX:32503194   | c.2645A>G            | male sex                    | 23/66                                 | 0/66                                      | 43/66                                   | 0.000000001 |
| DMD    | rs228373   | chrX:32563263   | c.2168+13T>C         | male sex                    | 44/66                                 | 0/66                                      | 22/66                                   | 0.000003962 |
| DMD    | rs115571   | chrX:32563488   | c.1993-37T>G         | male sex                    | 24/66                                 | 0/66                                      | 42/66                                   | 0.000006798 |
| DMD    | rs5927082  | chrX:32591811   | c.1704+51T>C         | male sex                    | 48/66                                 | 0/66                                      | 18/66                                   | 0.000000914 |
| DMD    | rs5927083  | chrX:32591931   | c.1635A>G            | male sex                    | 48/66                                 | 0/66                                      | 18/66                                   | 0.000000914 |



| <b>Supplementar<br/>y Table S4.</b> | <b>rs ID</b> | <b>Genome position</b> | <b>CDS position</b> | <b>Variable</b>                  | <b>R</b>   | <b>p-value</b> |
|-------------------------------------|--------------|------------------------|---------------------|----------------------------------|------------|----------------|
| <i>SHOC2</i>                        | rs11593866   | chr10:112771339        | c.1541-29A>T        | ECO RVOT PSAX                    | 0.6042512  | 0.00001106     |
| <i>LAMA2</i>                        | rs55776770   | chr6:129837320         | c.9212-15C>A        | number of VF                     | 0.5623516  | 0.00000006     |
| <i>KCND3</i>                        | rs640029     | chr1:112321032         | c.1518+26A>T        | CMR number of segments with LGE  | 0.5479431  | 0.00036943     |
| <i>LAMA2</i>                        | rs17057158   | chr6:129670548         | c.4523+19C>T        | ECO RVOT PSAX                    | 0.5213991  | 0.00024002     |
| <i>LAMA2</i>                        | rs17057184   | chr6:129691132         | c.4956C>G           | ECO RVOT PSAX                    | 0.5213991  | 0.00024002     |
| <i>MYBPC3</i>                       | rs3729948    | chr11:47360053         | c.2308+18C>G        | number of SVT                    | 0.4926425  | 0.00000345     |
| <i>TTN</i>                          | rs72648907   | chr2:179612383         | c.14744G>A          | number of syncope                | 0.4877090  | 0.00000446     |
| <i>MYBPC3</i>                       | rs3729948    | chr11:47360053         | c.2308+18C>G        | number of MAE                    | 0.4829326  | 0.00000432     |
| <i>TRIM63</i>                       | rs35123100   | chr1:26392824          | c.267G>T            | CMR RV EDV                       | 0.4811918  | 0.00023016     |
| <i>TMEM43</i>                       | rs34099410   | chr3:14172381          | c.222C>T            | CRP                              | 0.4800097  | 0.00001729     |
| <i>KLF10</i>                        | .            | chr8:103662353         | c.*7G>A             | number of PVCs in 24h            | 0.4742405  | 0.00001723     |
| <i>KLF10</i>                        | .            | chr8:103663390         | c.1170G>A           | number of PVCs in 24h            | 0.4742405  | 0.00001723     |
| <i>HCN4</i>                         | rs12909882   | chr15:73621946         | c.1558C>T           | CRP                              | 0.4740870  | 0.00002267     |
| <i>KRAS</i>                         | rs1137282    | chr12:25362777         | c.519T>C            | number of VF                     | 0.4620096  | 0.00001603     |
| <i>MYBPC3</i>                       | rs3729948    | chr11:47360053         | c.2308+18C>G        | number of arrhythmic events      | 0.4482575  | 0.00002409     |
| <i>NEXN</i>                         | rs41312654   | chr1:78399212          | c.1251+48T>C        | number of syncope                | 0.4323942  | 0.00006192     |
| <i>RYR1</i>                         | .            | chr19:38980666         | c.5815-50C>T        | number of SVT                    | 0.4225643  | 0.00009438     |
| <i>APOA5</i>                        | rs3135507    | chr11:116661488        | c.457G>A            | BMI                              | 0.4222252  | 0.00011788     |
| <i>MYBPC3</i>                       | rs1052373    | chr11:47354787         | c.3288G>A           | number of arrhythmic events      | 0.4216149  | 0.00007985     |
| <i>MYH6</i>                         | rs178637     | chr14:23854272         | c.5164-22A>G        | ECO LV EF                        | 0.4153594  | 0.00017241     |
| <i>GPD1L</i>                        | rs2305361    | chr3:32200322          | c.619-46T>C         | number of NSVT                   | 0.4097513  | 0.00016040     |
| <i>MYL2</i>                         | rs2301610    | chr12:111353556        | c.132T>C            | number of SVT                    | 0.4001450  | 0.00023545     |
| <i>COL5A1</i>                       | rs76855839   | chr9:137687183         | c.2799+22C>T        | TFC tissue characterization      | 0.3974486  | 0.00021788     |
| <i>CREB3L3</i>                      | rs35474881   | chr19:4154910          | c.42C>T             | TFC depolarization abnormalities | 0.3940362  | 0.00024954     |
| <i>GPD1L</i>                        | rs11351972   | chr3:32188248          | c.618+23del         | number of NSVT                   | 0.3930399  | 0.00031045     |
| <i>DPP6</i>                         | rs35392762   | chr7:154379517         | c.785C>T            | number of TWI                    | 0.3883579  | 0.00040520     |
| <i>DPP6</i>                         | rs75213895   | chr7:154379739         | c.1007C>T           | number of TWI                    | 0.3883579  | 0.00040520     |
| <i>CASQ2</i>                        | rs28730711   | chr1:116243868         | c.1194T>C           | number of arrhythmic events      | 0.3867453  | 0.00033183     |
| <i>DPP6</i>                         | rs35392762   | chr7:154379517         | c.785C>T            | TFC all                          | 0.3849256  | 0.00035594     |
| <i>DPP6</i>                         | rs75213895   | chr7:154379739         | c.1007C>T           | TFC all                          | 0.3849256  | 0.00035594     |
| <i>MYBPC3</i>                       | rs1052373    | chr11:47354787         | c.3288G>A           | number of SVT                    | 0.3807412  | 0.00049387     |
| <i>MYL2</i>                         | rs2301610    | chr12:111353556        | c.132T>C            | number of MAE                    | 0.3788648  | 0.00044826     |
| <i>GAA</i>                          | rs2304836    | chr17:78086846         | c.2040+20A>G        | CRP                              | -0.4112351 | 0.00030122     |
| <i>GAA</i>                          | rs2304832    | chr17:78090928         | c.2331+20G>A        | CRP                              | -0.4232299 | 0.00019102     |
| <i>GAA</i>                          | rs1126690    | chr17:78091405         | c.2338G>A           | CRP                              | -0.4379955 | 0.00010647     |
| <i>FBN2</i>                         | rs190450     | chr5:127614472         | c.7200T>C           | number of syncope                | -0.4467496 | 0.00003267     |
| <i>HCN4</i>                         | rs481579     | chr15:73616635         | c.1979-41A>G        | TFC depolarization abnormalities | -0.4500798 | 0.00002211     |
| <i>DPP6</i>                         | rs3807218    | chr7:154461112         | c.723A>G            | number of PVCs in 24h            | -0.4641023 | 0.00002741     |

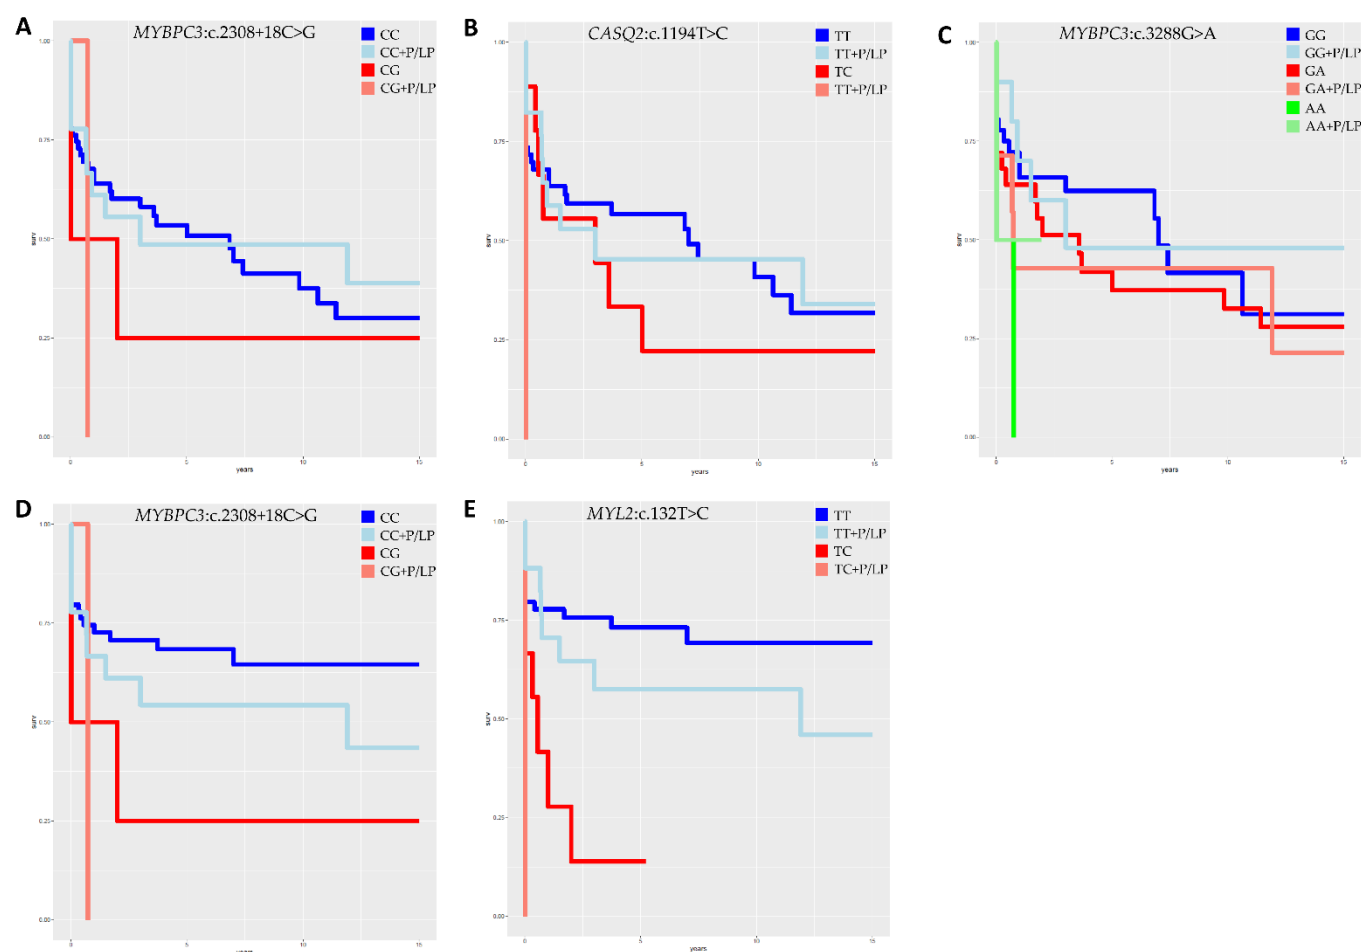

**Supplementary Figure S3.** Kaplan Meier curves representing the arrhythmic events-free survival during follow-up time in association with *MYBPC3*:c.2308+18C>G variants (A), *CASQ2*:c.1194T>C (B) and *MYBPC3*:c.3288G>A (C) in coexistence with ACM pathogenic/likely pathogenic variants. Kaplan Meier curves representing the MAE-free survival during follow-up time in association with *MYBPC3*:c.2308+18C>G (D) and *MYL2*:c.132T>C (E) variants, in coexistence with ACM pathogenic/likely pathogenic variants. The patients carrying pathogenic/likely pathogenic variants were indicated as “+P/LP”. “MAE” includes syncope, sustained ventricular tachycardia and ventricular fibrillation. “Arrhythmic event” includes NSVT, syncope, SVT and VF.

Results showed that the presence of ACM pathogenic/likely pathogenic variants in patients carrying the polymorphisms *MYBPC3*:c.3288G>A, *MYBPC3*:c.2308+18C>G and *CASQ2*:c.1194T>C did not significantly influence the increased susceptibility to develop arrhythmias in the follow-up (S3A, B and C) (*MYBPC3*:c.3288G>A WT+P/LP vs WT: HR=0.89 [0.33–2.43],  $p=0.82$ ; heterozygous+P/LP vs heterozygous: HR=1.08 [0.40–2.93],  $p=0.88$ ; homozygous+P/LP vs homozygous: HR=0.4 [0.03–4.46],  $p=0.46$ . *MYBPC3*:c.2308+18C>G WT+P/LP vs WT: HR=0.93 [0.46–1.89],  $p=0.84$ ; heterozygous+P/LP vs heterozygous: HR=1.65 [0.16–16.16],  $p=0.67$ . *CASQ2*:c.1194T>C WT+P/LP vs WT: HR=1.04 [0.51–2.15],  $p=0.91$ ; heterozygous+P/LP vs heterozygous: HR=6.05 [0.71–51.35],  $p=0.1$ ).

Likewise, the presence of pathogenic/likely pathogenic variants in patients carrying the variants *MYBPC3*:c.2308+18C>G and *MYL2*:c.132T>C did not significantly influence the higher risk of manifesting MAE (S3D and E). (*MYBPC3*:c.2308+18C>G WT+P/LP vs WT: HR=1.56 [0.70–3.45],  $p=0.27$ ; heterozygous+P/LP vs heterozygous: HR=1.20 [0.12–11.7],  $p=0.87$ . *MYL2*:c.132T>C WT+P/LP vs WT: HR=1.64 [0.70–3.88],  $p=0.26$ ; heterozygous+P/LP vs heterozygous: HR=3.1 [0.32–15.3],  $p=0.17$ ).
